# Supplementary material
Source: MDPI journal article supplement (https://www.mdpi.com/1999-4907/15/1/46)
Supplement: s1 [file s1]

## Supplementary Materials

**Table S1.** Two-way ANOVA results for woody plant height, RCD and root length.

| Source              | DF | Height  |        | RCD     |               | Root length |        |
|---------------------|----|---------|--------|---------|---------------|-------------|--------|
|                     |    | F value | Pr>F   | F value | Pr>F          | F value     | Pr>F   |
| Species             | 2  | 2.37    | 0.115  | 11.67   | <b>0.0003</b> | 2.44        | 0.1101 |
| Treatment           | 2  | 0.74    | 0.4867 | 3.65    | 0.0413        | 0.65        | 0.5317 |
| Speices × treatment | 4  | 0.48    | 0.7527 | 0.74    | 0.5746        | 1.11        | 0.3787 |

**Table S2.** Two-way ANOVA results for Above-ground and below-ground biomass.

| Source              | DF | Leaf biomass |               | Branch biomass |        | Stem biomass |               | Root biomass |               | Total biomass |               |
|---------------------|----|--------------|---------------|----------------|--------|--------------|---------------|--------------|---------------|---------------|---------------|
|                     |    | F value      | Pr>F          | F value        | Pr>F   | F value      | Pr>F          | F value      | Pr>F          | F value       | Pr>F          |
|                     |    |              |               |                |        |              |               |              |               |               |               |
| Species             | 2  | 7.63         | <b>0.0027</b> | 0.48           | 0.6259 | 8.85         | <b>0.0013</b> | 13.75        | <b>0.0001</b> | 8.93          | <b>0.0013</b> |
| Treatment           | 2  | 0.77         | 0.4743        | 1.39           | 0.2679 | 2.41         | 0.1116        | 2.26         | 0.1263        | 1.96          | 0.1626        |
| Speices × treatment | 4  | 0.19         | 0.9436        | 0.96           | 0.4481 | 0.5          | 0.7391        | 1.64         | 0.1961        | 1.24          | 0.3203        |
